# Supplementary material for: Atypical neurogenesis in induced pluripotent stem cell (iPSC) from autistic individuals
Source: bioRxiv or medRxiv preprint supplement (doi:10.1101/349415), 2020-04-24
Supplement: Supplementary file [file 349415-1.pdf]

a

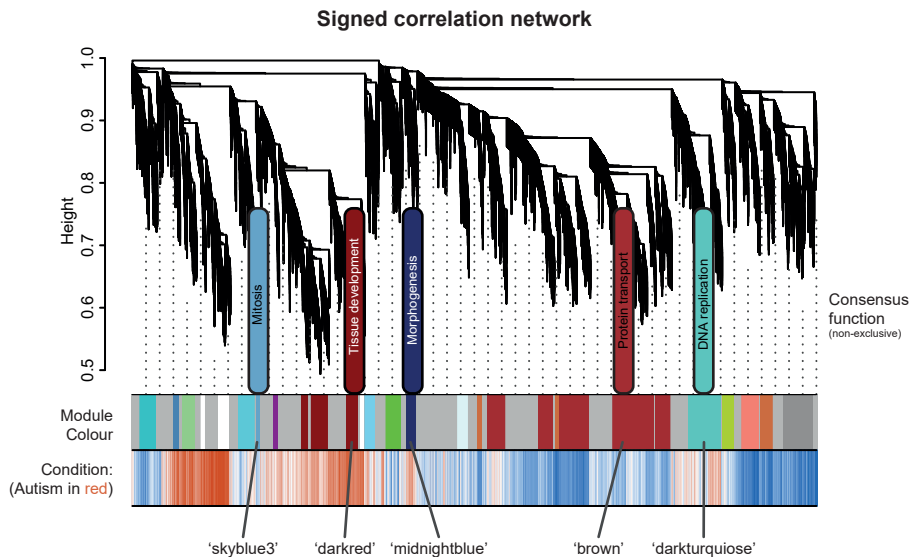

b

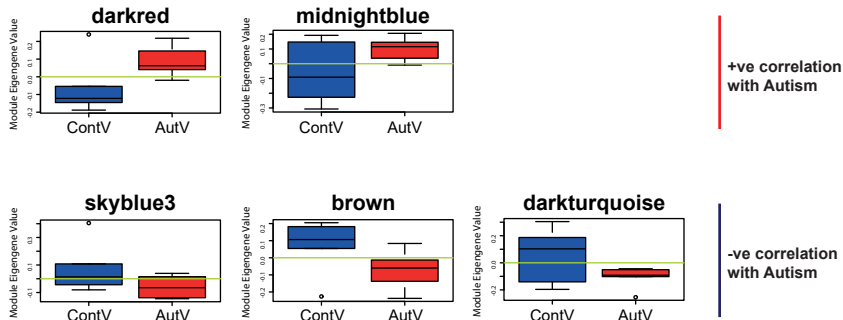

Figure S2

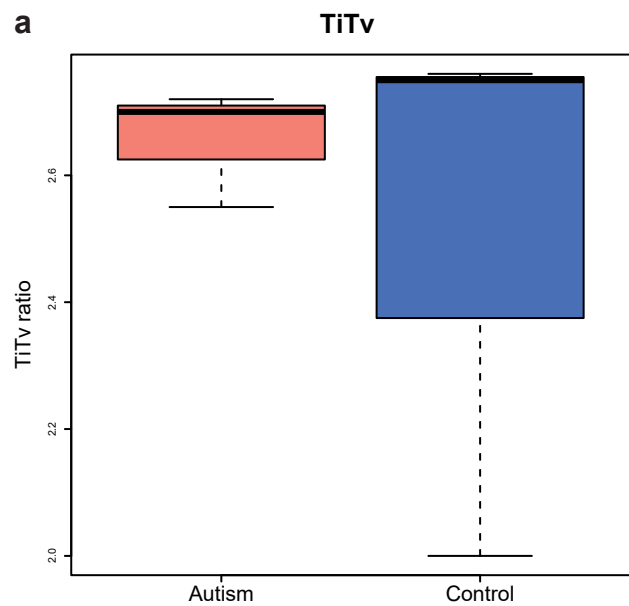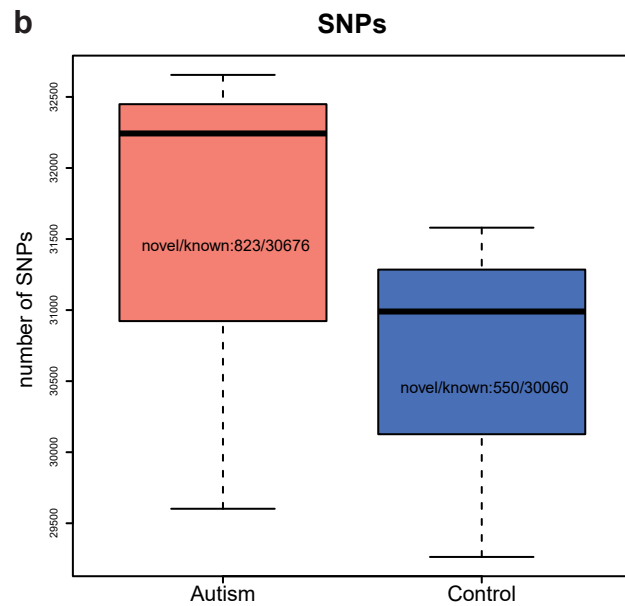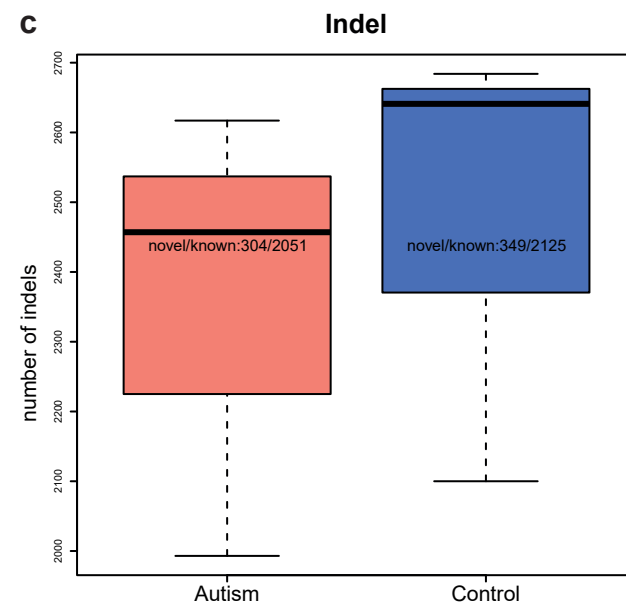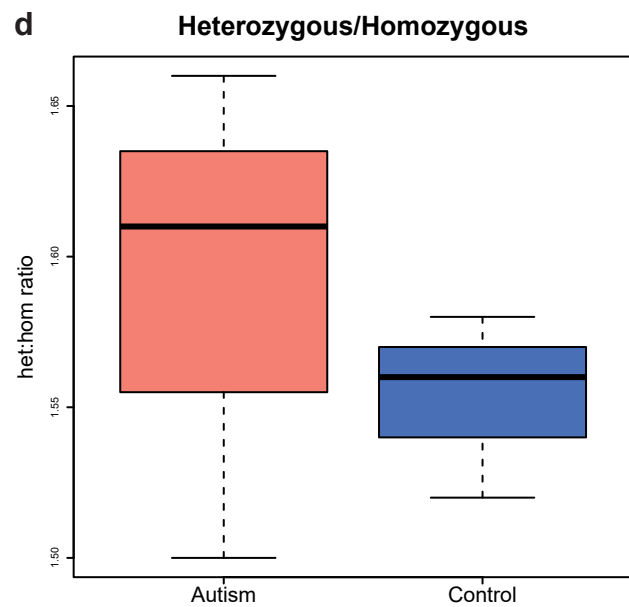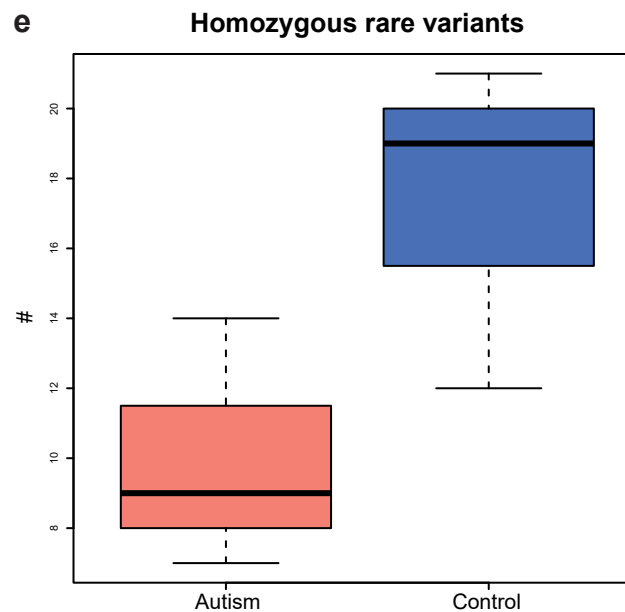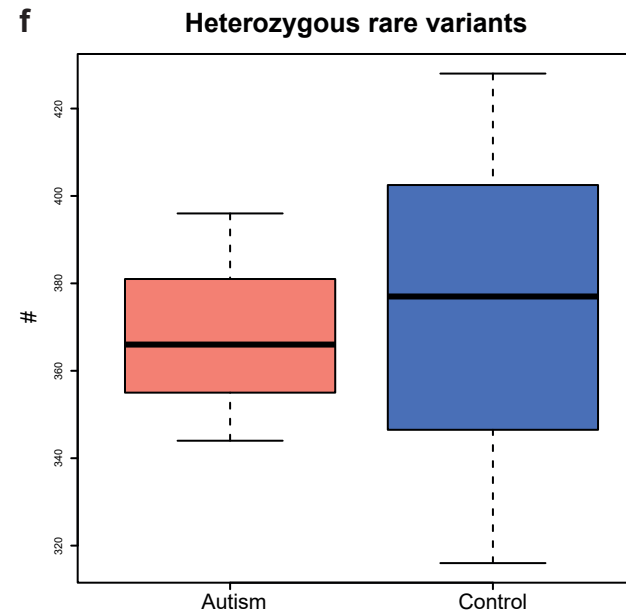

Figure S3

## Differential expression of ACP genes in iDN

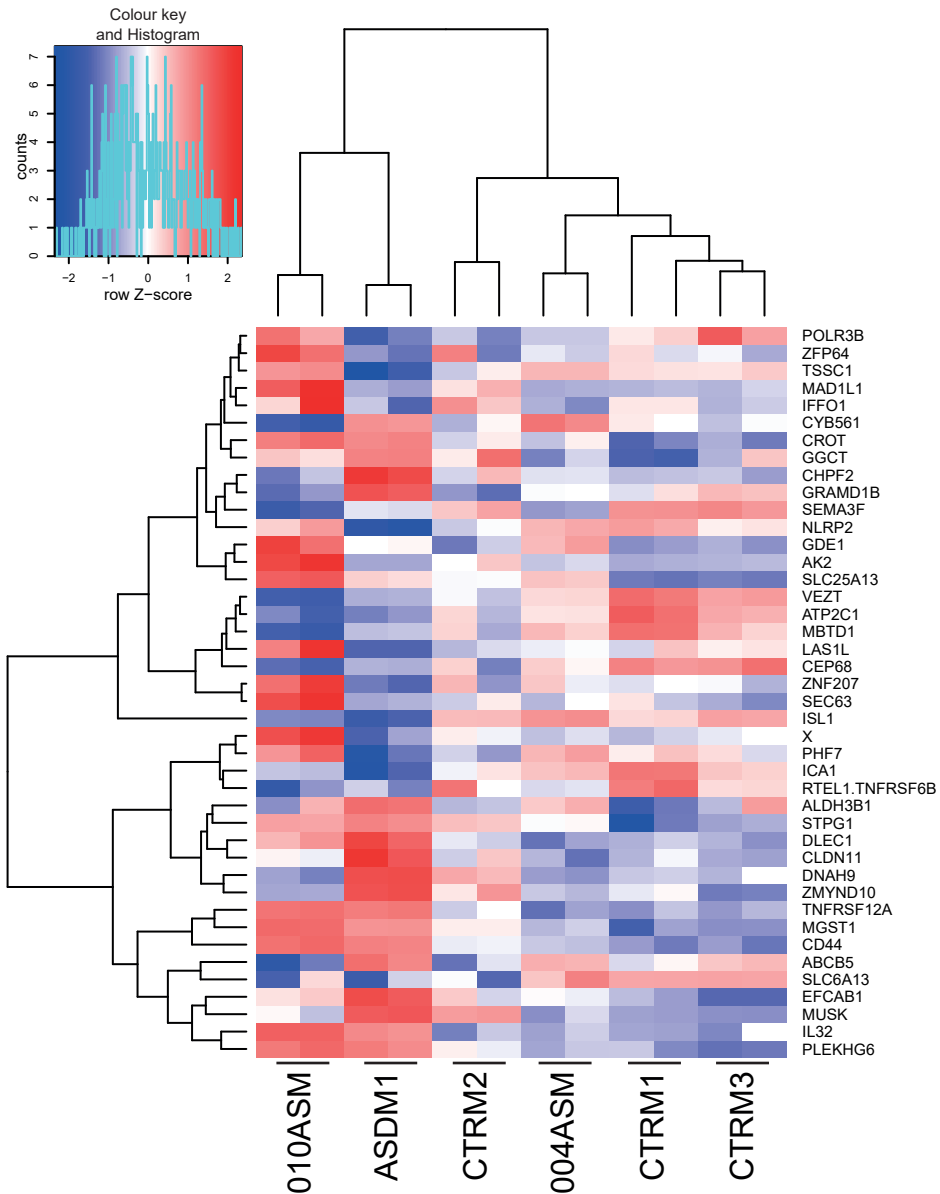

Figure S4

## Sample collection and RNA-seq

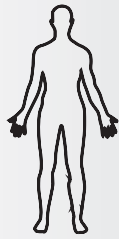

Hair follicle

Keratinocytes

Reprogramming  
(Takahashi et al., 2007)

iPSC

Cortical neuron differentiation  
(Shi et al., 2012)

Neurons

cDNA library prep  
(Illumina TruSeq)

cDNA library

Illumina HiSeq2500

Nucleotide sequences

## Bioinformatic analysis

Genome alignment (STAR: RNAseq aligner)

Aligned sequences (RAW data)

Quality check (Picard tools, QoRTs)  
Read counts (HTSeq)

Read counts

Quantile normalization (cqn)

Normalized counts

DEX (R function: lm)

Differential gene expression

Gene network analysis (WGCNA)

Gene co-expression modules

Logistic regression (R function: glm)  
Fisher's exact test (R function: fisher.test)

Enriched gene modules

TFBS (Clover, MEME)

Transcription factors



Figure S5

a

## Scale independence

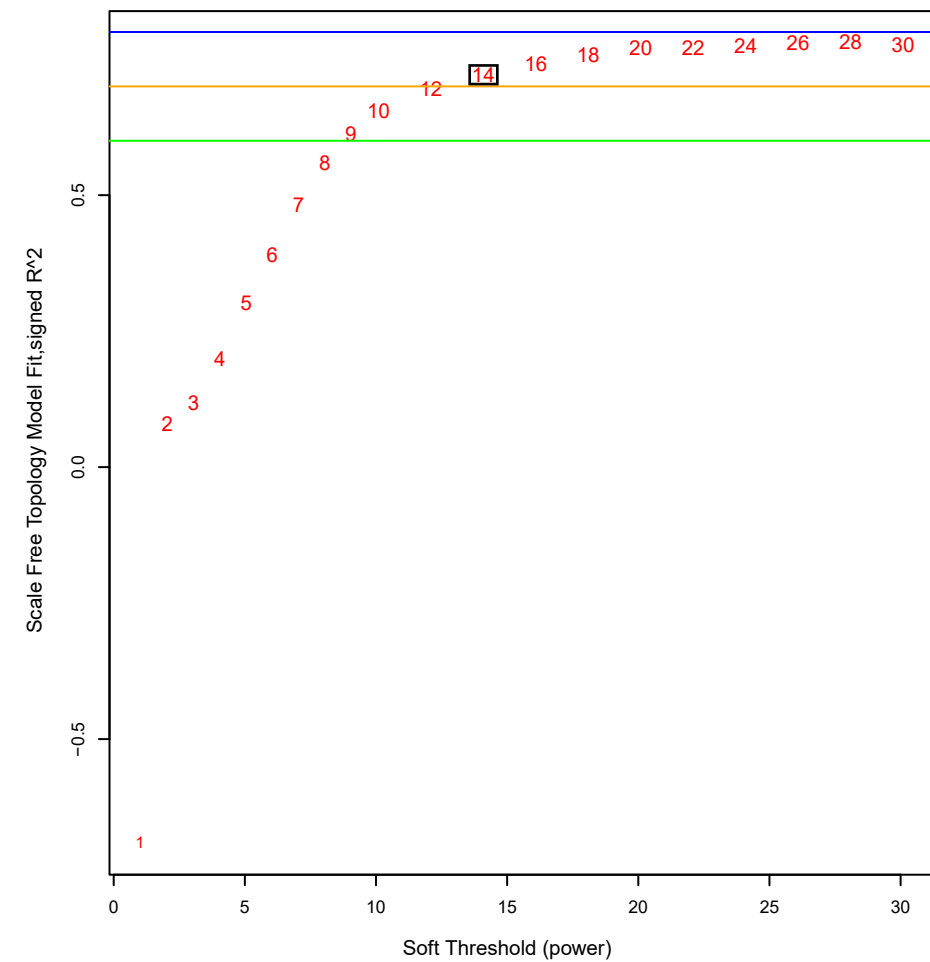

b

## Mean connectivity

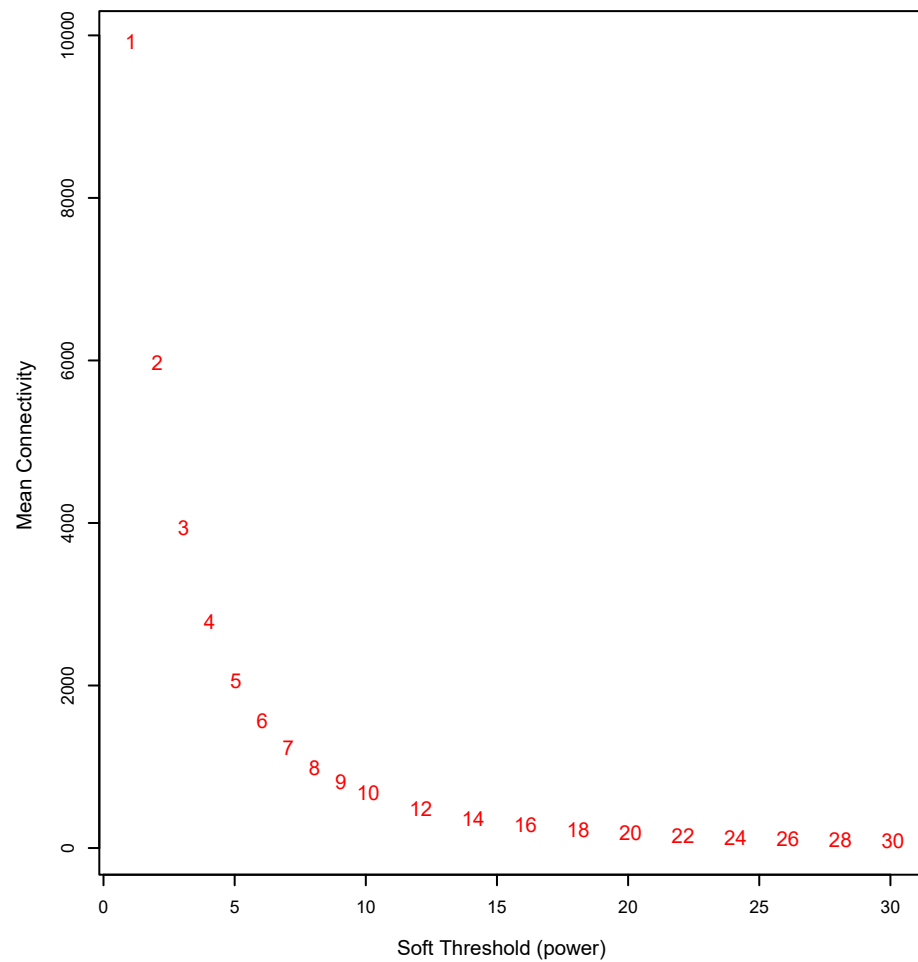

Figure S6

a

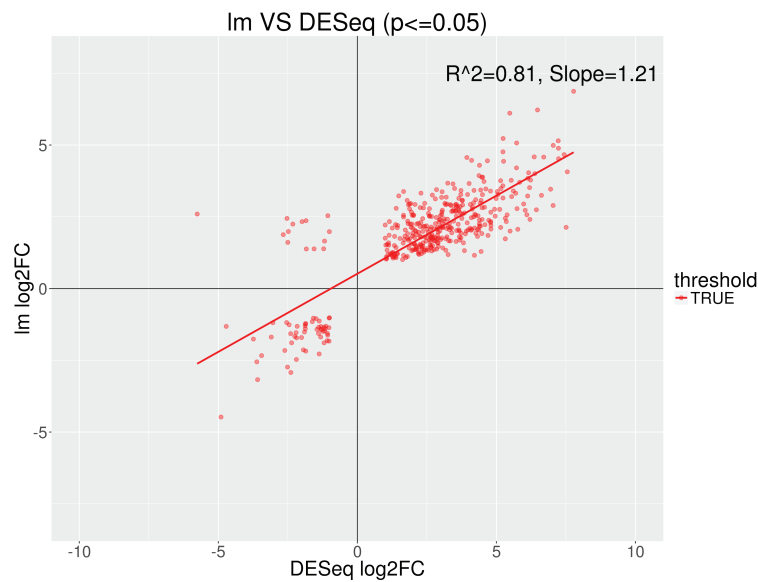

b

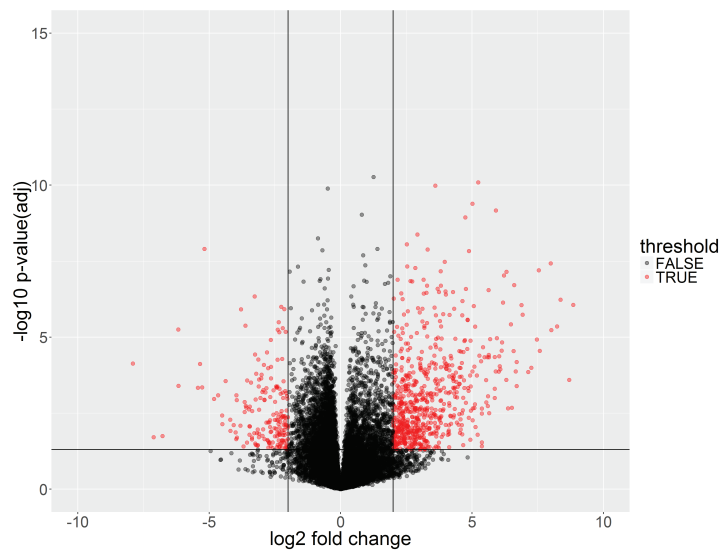

c

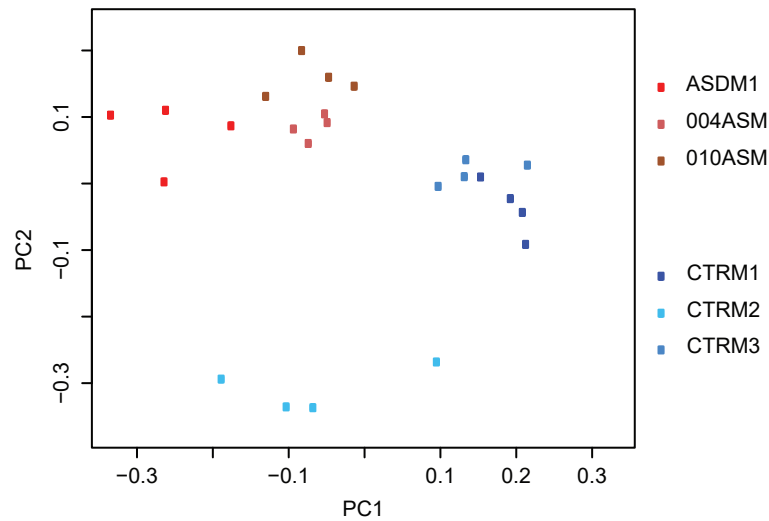

d

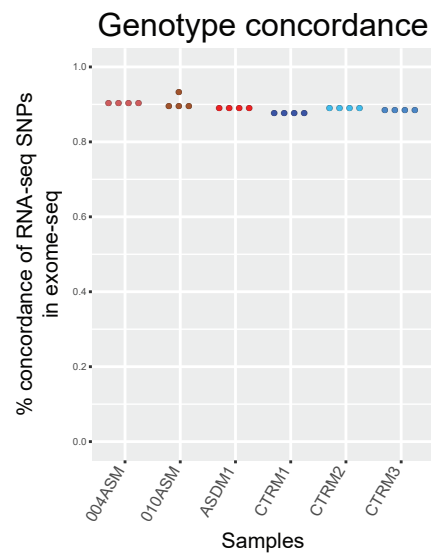

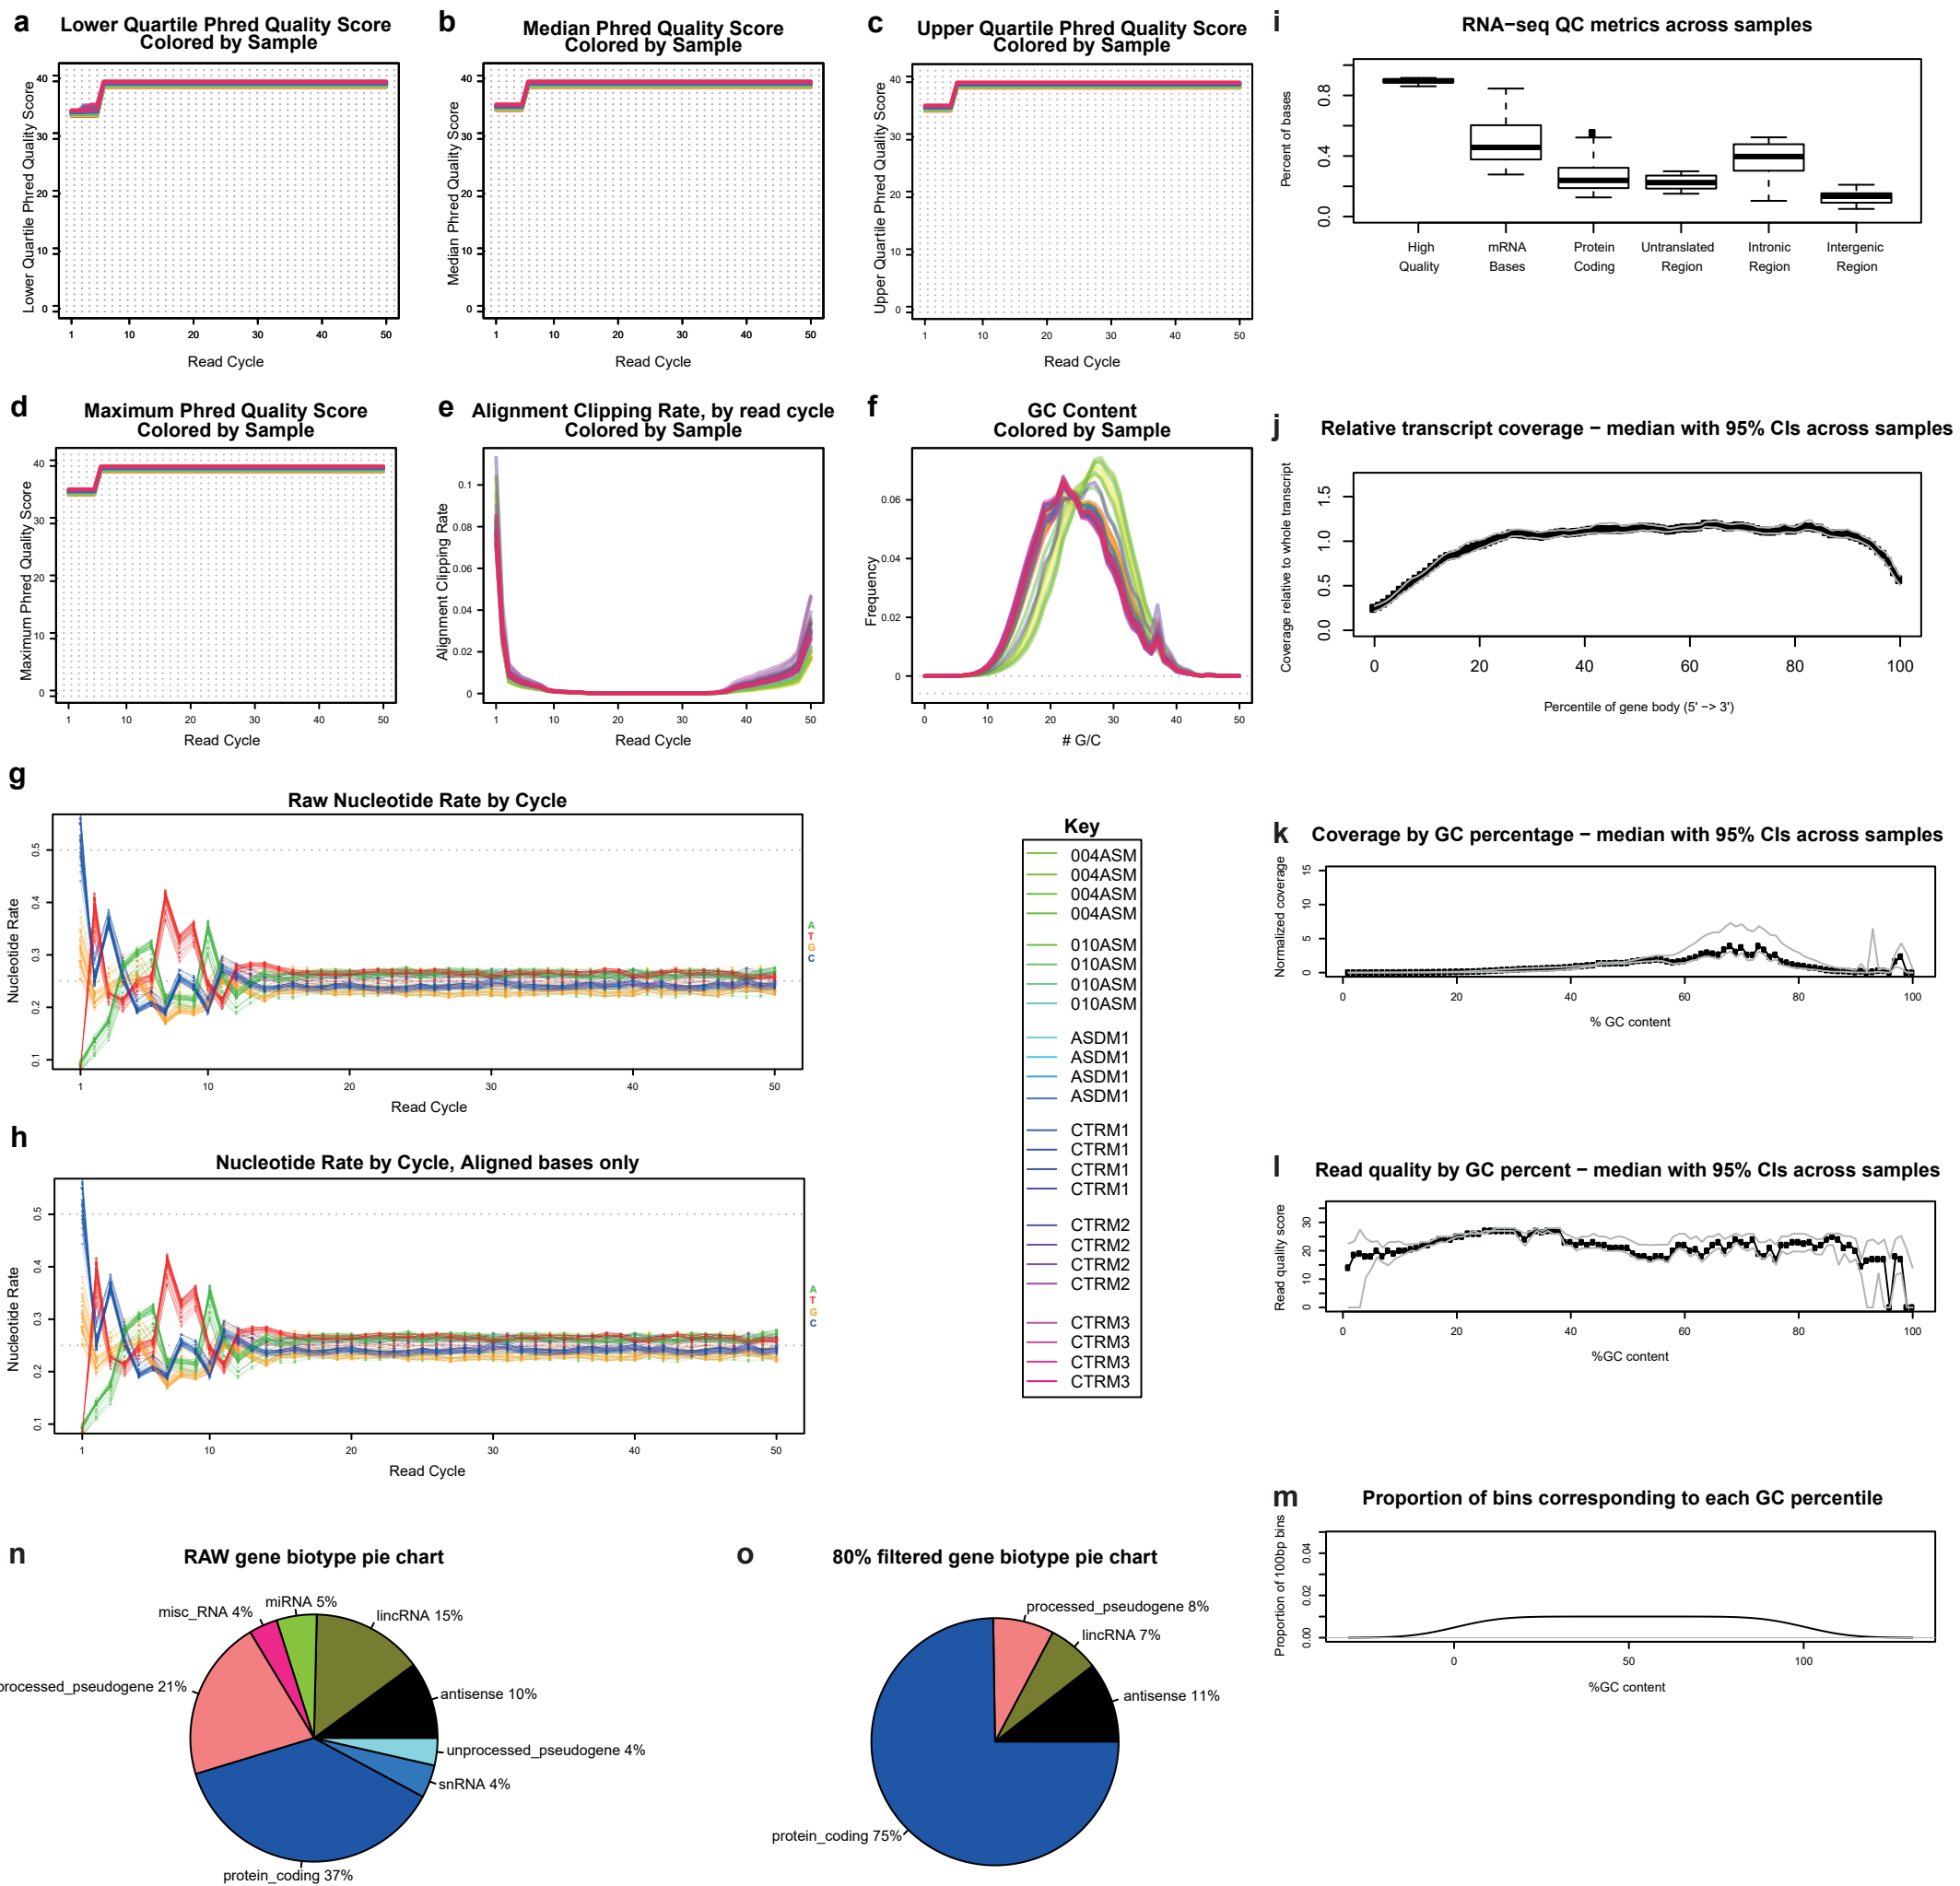

Figure S8

## Schizophrenia and Cancer gene module enrichment in iDN

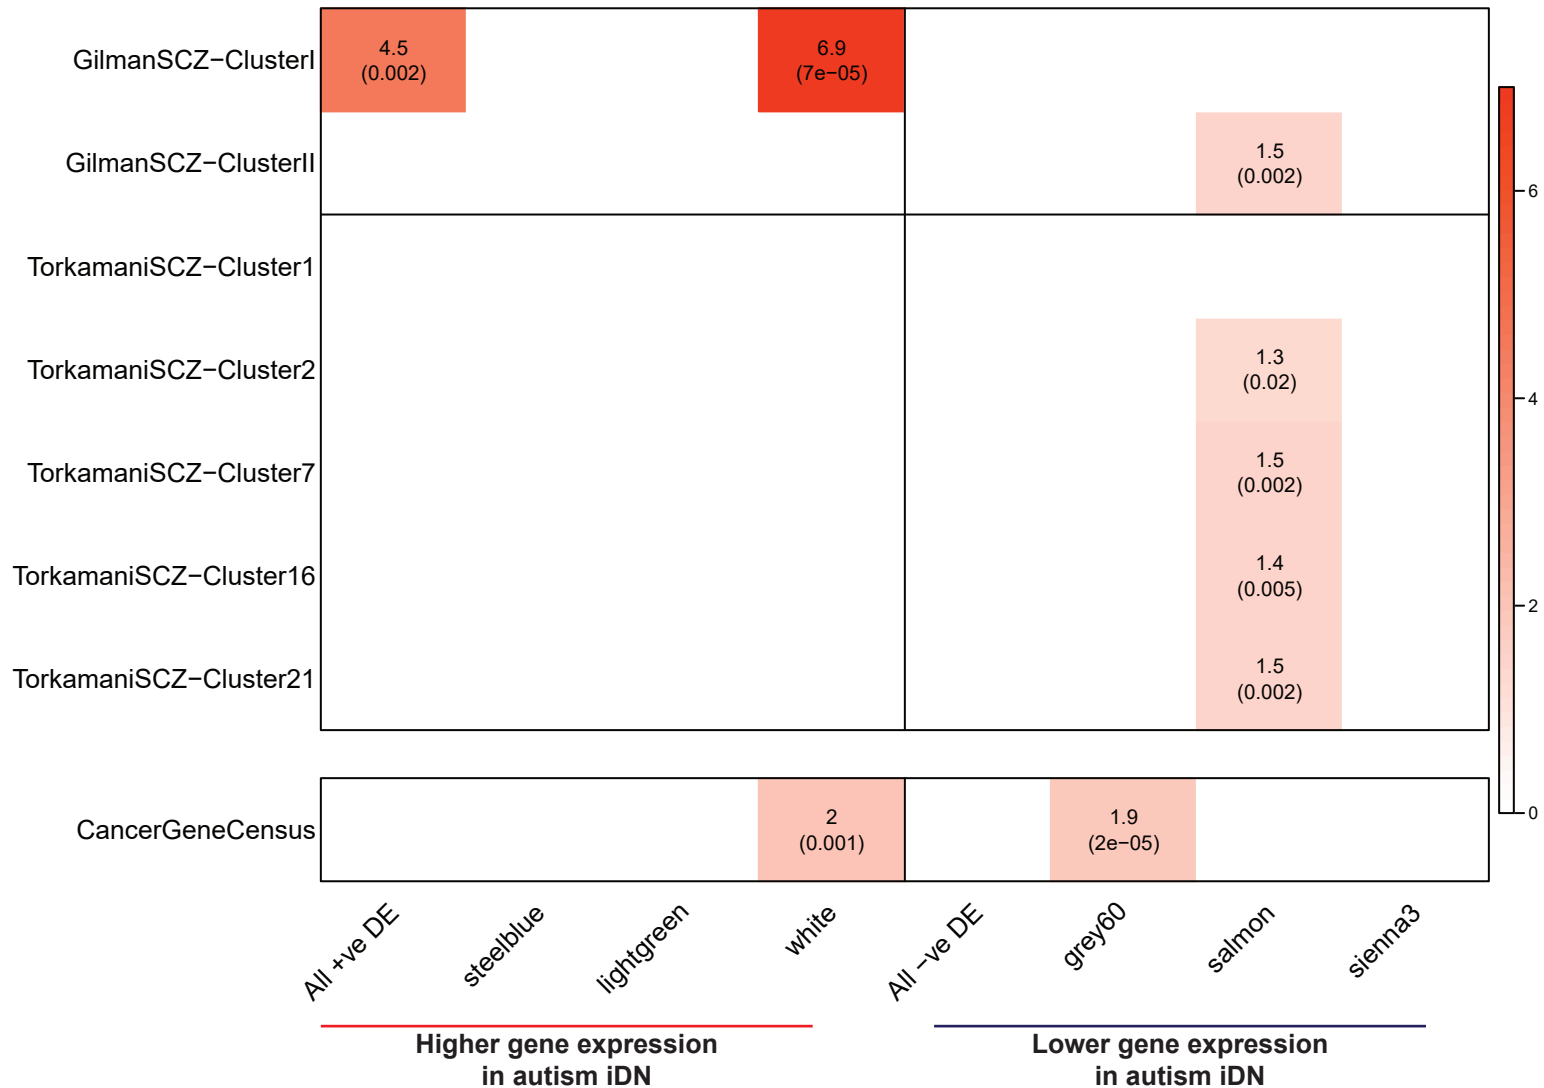

Figure S9

a. Control iPSC lines

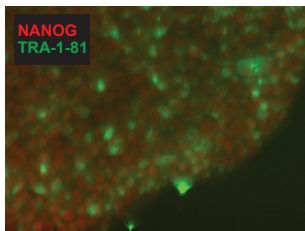

CTR.M1.04

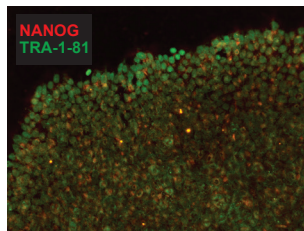

CTR.M3.22

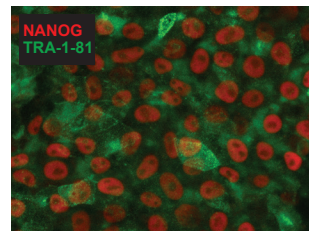

CTR.M2.42

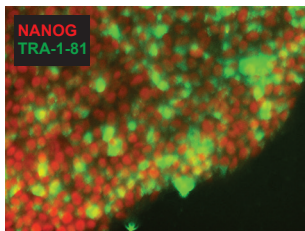

CTR.M1.11

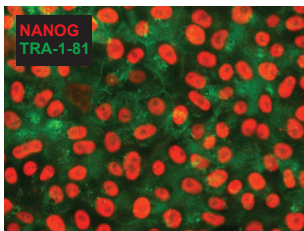

CTR.M3.15

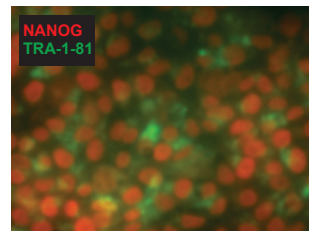

CTR.M2.05

b. Autism iPSC lines

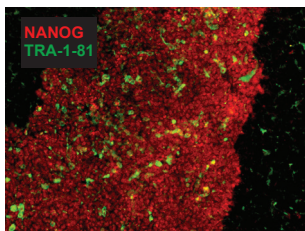

010.ASM.06

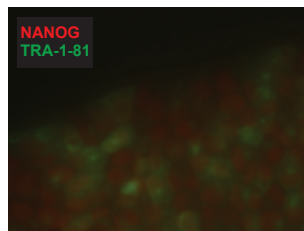

ASD.M1.08

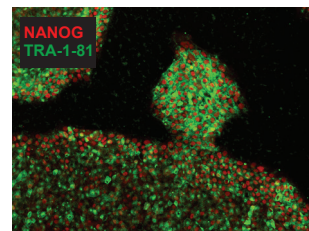

004.ASM.09

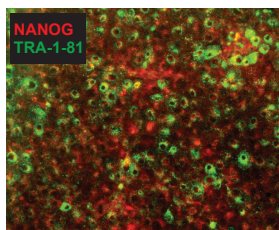

010.ASM.05

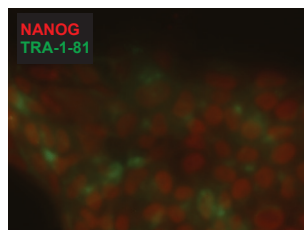

ASD.M1.01

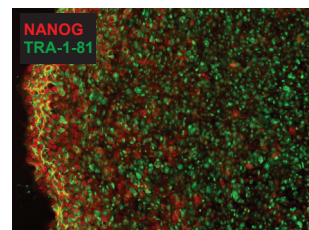

004.ASM.01
