# Supplementary material for: Atypical neurogenesis in induced pluripotent stem cell (iPSC) from autistic individuals
Source: bioRxiv or medRxiv preprint supplement (doi:10.1101/349415), 2020-04-24
Supplement: Supplementary file [file 349415-2.pdf]

**Table S1: Diagnosis details of individuals with autism.**

| Donor ID | ADOS        |               |             |                       | IQ              |        |             | BDI | Sex | Age |
|----------|-------------|---------------|-------------|-----------------------|-----------------|--------|-------------|-----|-----|-----|
|          | Social Comm | Communication | Imagination | Stereotypic behaviour | Full Scale WASI | Verbal | Performance |     |     |     |
| ASDM1    | 4           | 4             | 1           | 3                     | 127             | 127    | 120         | 22  | M   | 34  |
| 004ASM   | 8           | 4             | 1           | 2                     | 89              | 96     | 84          | 3   | M   | 26  |
| 010ASM   | 5           | 5             | 1           | 2                     | 133             | 128    | 132         | 25  | M   | 27  |
